# Supplementary material for: A Protein Thermometer Controls Temperature-Dependent Transcription of Flagellar Motility Genes in Listeria monocytogenes
Source: PubMed Central journal article supplement (PMC3150276; doi:10.1371/journal.ppat.1002153), 2011-08-04
Supplement: ppat.1002153.s001.pdf [file ppat.1002153.s001.pdf]

# Kamp\_FigS1

A

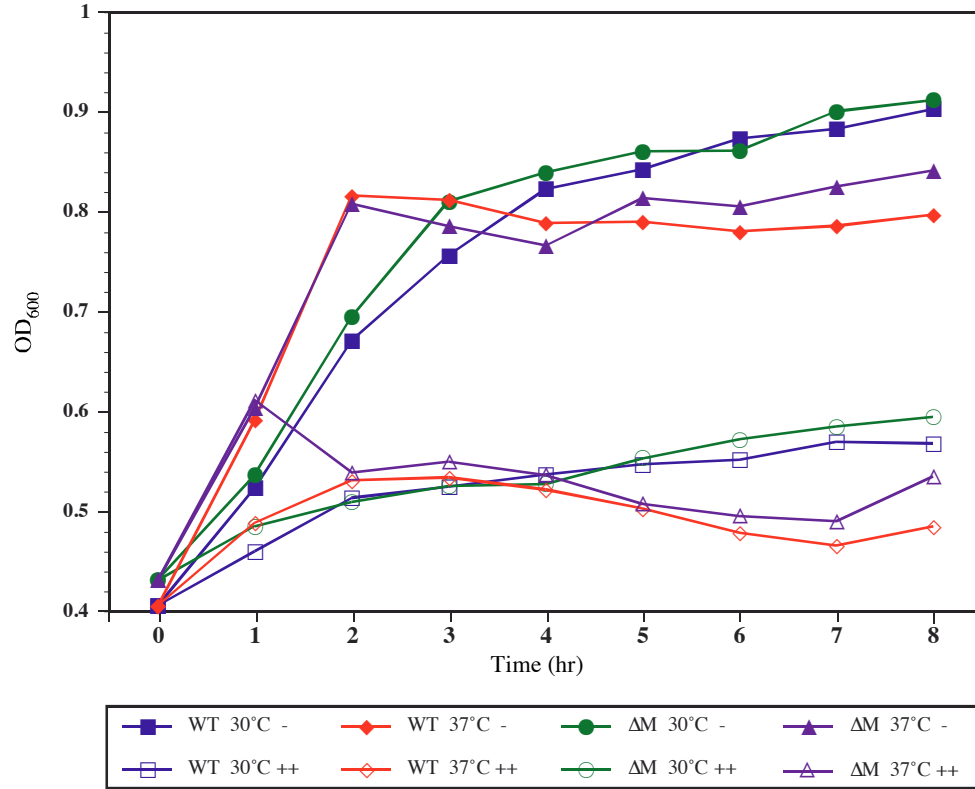

B

| Time (hr) | WT 30°C              |                      | WT 37°C              |                      | ΔM 30°C              |                      | ΔM 37°C              |                      |
|-----------|----------------------|----------------------|----------------------|----------------------|----------------------|----------------------|----------------------|----------------------|
|           | -                    | ++                   | -                    | ++                   | -                    | ++                   | -                    | ++                   |
| 0         | 2.80x10 <sup>8</sup> | 2.80x10 <sup>8</sup> | 2.80x10 <sup>8</sup> | 2.80x10 <sup>8</sup> | 2.70x10 <sup>8</sup> | 2.70x10 <sup>8</sup> | 2.70x10 <sup>8</sup> | 2.70x10 <sup>8</sup> |
| 4         | 1.04x10 <sup>9</sup> | 4.00x10 <sup>8</sup> | 1.06x10 <sup>9</sup> | 3.90x10 <sup>8</sup> | 4.30x10 <sup>8</sup> | 3.80x10 <sup>8</sup> | 5.10x10 <sup>8</sup> | 2.49x10 <sup>8</sup> |
| 8         | 1.37x10 <sup>9</sup> | 3.50x10 <sup>8</sup> | 1.07x10 <sup>9</sup> | 2.32x10 <sup>8</sup> | 2.99x10 <sup>9</sup> | 2.90x10 <sup>8</sup> | 1.65x10 <sup>9</sup> | 1.87x10 <sup>8</sup> |
