# Supplementary material for: A Protein Thermometer Controls Temperature-Dependent Transcription of Flagellar Motility Genes in Listeria monocytogenes
Source: PubMed Central journal article supplement (PMC3150276; doi:10.1371/journal.ppat.1002153), 2011-08-04

A

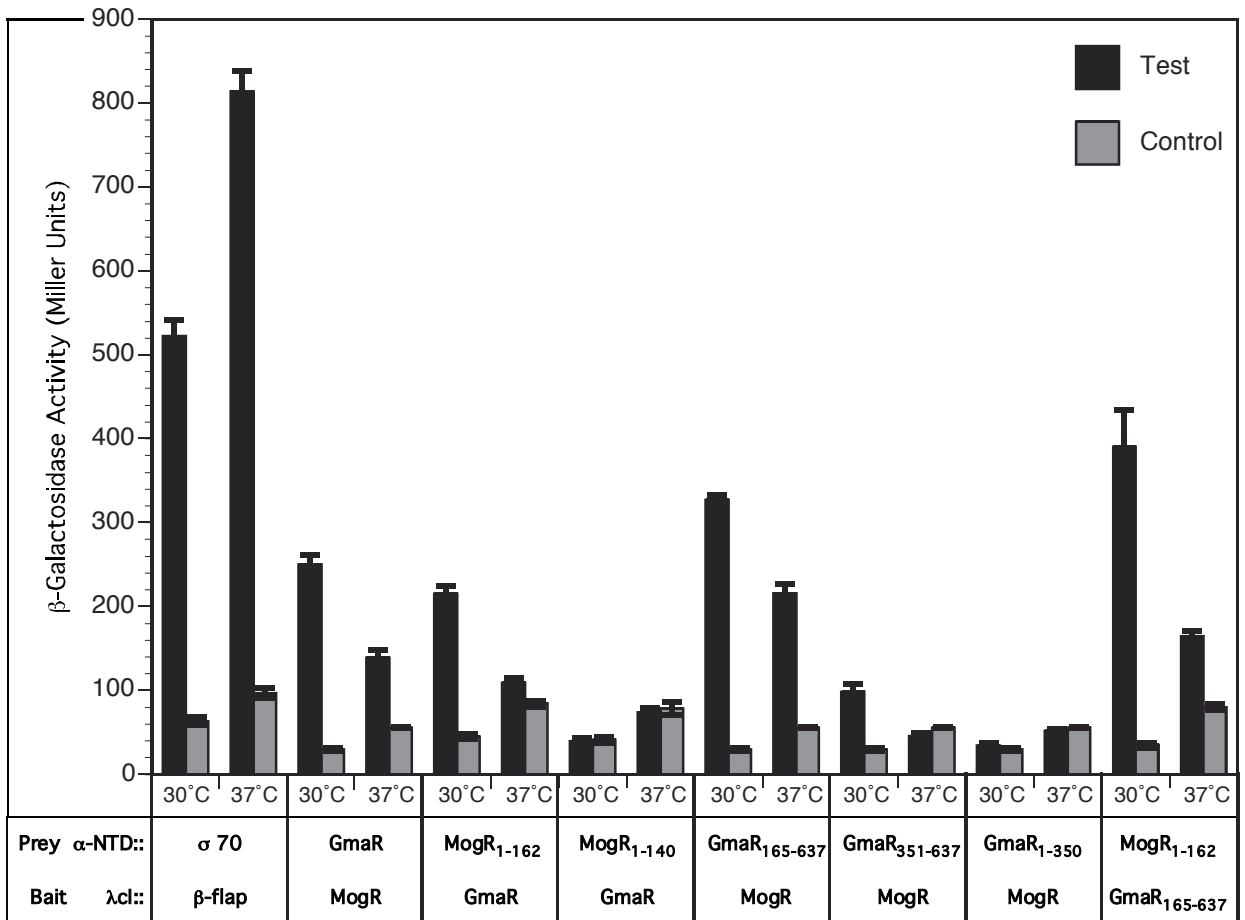

B

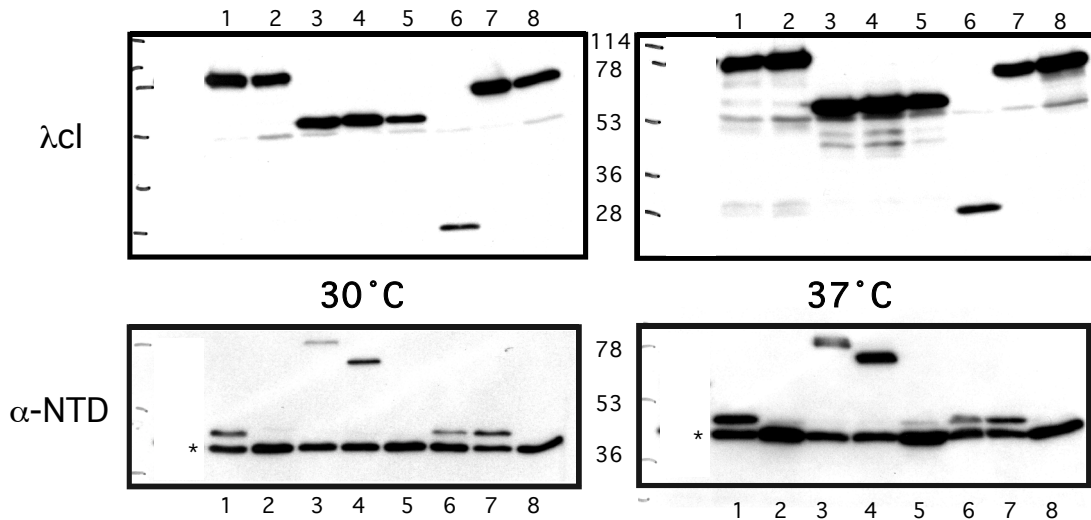

Supplement: ppat.1002153.s002.pdf [file ppat.1002153.s002.pdf]
