# Supplementary material for: A Protein Thermometer Controls Temperature-Dependent Transcription of Flagellar Motility Genes in Listeria monocytogenes
Source: PubMed Central journal article supplement (PMC3150276; doi:10.1371/journal.ppat.1002153), 2011-08-04
Supplement: ppat.1002153.s003.pdf [file ppat.1002153.s003.pdf]

# Kamp\_FigS3

TGTTTTTTTATTTTTACACACAATTTCATTTTTTAAAAAAAGTATAGATTTTTTCAGGATTGGTGTAAAATTTTATATTGC - 95 bp - **ATG**  
**PfliN-gmaR**

CTTCCTTTTTTATTTTTAAAAAAATAAATTTATAAAAAACATAAAAAACGTTGATATAAAGCCGATATTTTCGTTT  
TTTTATAAATAAAAAACAACCTATTTTTACATTTTTTAATAAAAAACATTGATTTTTTTAAAAAAATGAAGATATAATAAAGCATA - 48 bp - **ATG**  
**PflaA**
