# Supplementary material for: A Protein Thermometer Controls Temperature-Dependent Transcription of Flagellar Motility Genes in Listeria monocytogenes
Source: PubMed Central journal article supplement (PMC3150276; doi:10.1371/journal.ppat.1002153), 2011-08-04

# Kamp\_FigS5

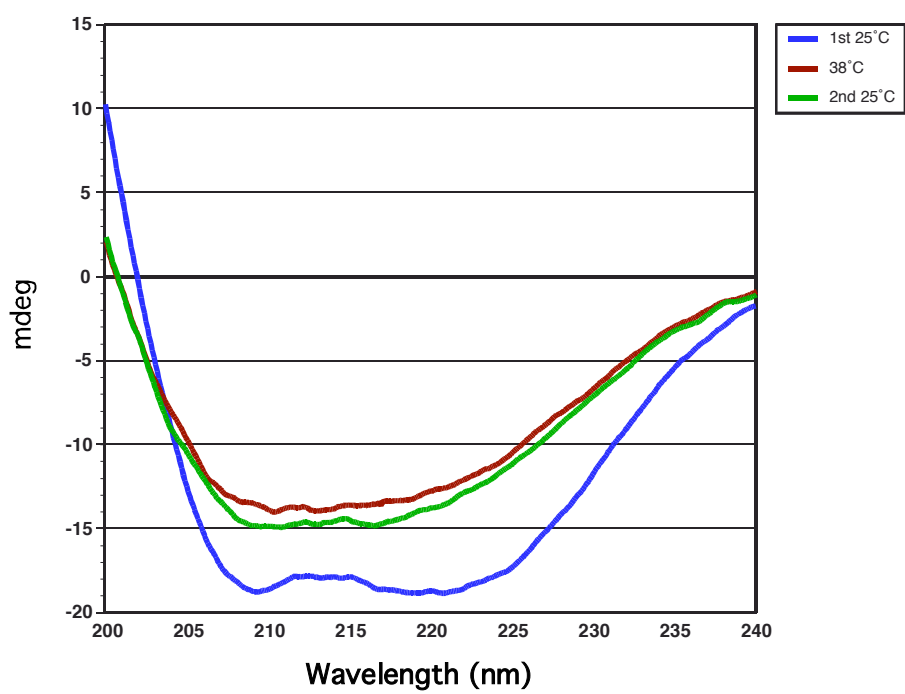

Supplement: ppat.1002153.s005.pdf [file ppat.1002153.s005.pdf]
