# Supplementary material for: A Protein Thermometer Controls Temperature-Dependent Transcription of Flagellar Motility Genes in Listeria monocytogenes
Source: PubMed Central journal article supplement (PMC3150276; doi:10.1371/journal.ppat.1002153), 2011-08-04
Supplement: ppat.1002153.s006.pdf [file ppat.1002153.s006.pdf]

# Kamp\_FigS6

A

MRPLISICMIVKNEAHILRQSLASFRKFTEEIIIVDTGSTDETKEIAQEFDFVYDFEWT 60  
-----  
GNFSDARNFAAKHATGKWILAIDADECLLEESYRKLEKQLKSPTEPIQMAQIISFTGEKG 120  
-----  
RVTTTNQMARVYKNDGTICFRGVIHEQLEAIDKRPIAAGVAEVKIYHYGYMSEIVEKQDK 180  
-----  
SDRNLRLLEKEVKNNKNSGFVHFNIGQEMNRLGNKKEALKEFSEAFRLRDHNHYIWAKLS 240  
-----  
AYHIAELLEQEKRYDESLAIIIEEARVIWPNVPEFPLKKANILYVNHQLEDAKEIYQSLLE 300  
-----  
NTAIDYQPIVLYEATNFMPHKMLGTIYLEEKDYTRAMTHFSKAYAENSSDYGVMFQMIML 360  
-----  
LSKFHQPKEIFAFMERHHFISSTETGLRLLSMTTQQGYAELSELIVQSLTDVYPPVAEAT 420  
-----  
EVKIATIRNVFPVISESAILFGVKEELIDAADLCLWHYENPQLPIENVMKNSDVGDIYDF 480  
-----  
IFENGPRISKRYLFLVERAIALGKGEFADYLLALRNVYHDSINSHIADLFFQYDFADIA 540  
-----  
LDFYNIVDADEVTKQGYINLINYLVDADVLDALIAAERGIDNFSTDFRFYLWAIKIDTE 600  
-----  
NRANRISEAMDEFNNRYLAKLLDEVTMLQDVTNNR 637

B

| Secondary structure |       |
|---------------------|-------|
| $\alpha$ -helices   | 69.1% |
| $\beta$ -sheets     | 5.3%  |
| random              | 25.6% |
