# Supplementary material for: A Protein Thermometer Controls Temperature-Dependent Transcription of Flagellar Motility Genes in Listeria monocytogenes
Source: PubMed Central journal article supplement (PMC3150276; doi:10.1371/journal.ppat.1002153), 2011-08-04
Supplement: ppat.1002153.s007.pdf [file ppat.1002153.s007.pdf]

**Table S1. *Listeria monocytogenes* and *Escherichia coli* strains***Listeria monocytogenes*

| <b>Strain</b> | <b>Genotype and relevant features</b> | <b>Strain Designation</b> | <b>Reference</b> |
|---------------|---------------------------------------|---------------------------|------------------|
| DH-L478       | Wild-type <i>Lm</i> strain EGDe       | wild-type                 | M. Loessner      |
| DH-L1156      | <i>mogR</i> in-frame deletion in EGDe | $\Delta mogR$             | [3]              |

*Escherichia coli*

| <b>Strain</b>                | <b>Genotype and relevant features</b>                                                                                 | <b>Reference</b> |
|------------------------------|-----------------------------------------------------------------------------------------------------------------------|------------------|
| DH-E387                      | BL21star(DE3)                                                                                                         | Invitrogen       |
| DH-E182                      | XL1-Blue {F' <i>proAB lacI<sup>q</sup> Δ(lacZ)</i> M15 Tn10}<br><i>recA1 endA1 gyrA96 thi-1 hsdR17 supE relA1 lac</i> | Stratagene       |
| DH-E1335                     | pET29b- <i>mogR</i> in BL21(DE3)                                                                                      | [4]              |
| DH-E1951                     | pBR $\alpha$ in DH5 $\alpha$                                                                                          | [5]              |
| DH-E1952                     | pBR $\alpha$ - $\sigma^{70}$ D581G in DH5 $\alpha$                                                                    | [6]              |
| DH-E1953                     | pAC- $\lambda$ CI in DH5 $\alpha$                                                                                     | [5]              |
| DH-E1954                     | pAC- $\lambda$ CI- $\beta$ -flap (831-1057) in DH5 $\alpha$                                                           | [7]              |
| DH-E1979                     | pBR $\alpha$ - <i>gmaR</i> in XL1-Blue                                                                                | This study       |
| DH-E1981                     | pAC- $\lambda$ CI- <i>mogR</i> in XL1-Blue                                                                            | This study       |
| DH-E1982                     | pBR $\alpha$ - <i>mogR</i> <sub>1-162</sub> in XL1-Blue                                                               | This study       |
| DH-E1983                     | pBR $\alpha$ - <i>mogR</i> <sub>1-140</sub> in XL1-Blue                                                               | This study       |
| DH-E1984                     | pAC- $\lambda$ CI- <i>gmaR</i> in XL1-Blue                                                                            | This study       |
| DH-E1985                     | pBR $\alpha$ - <i>gmaR</i> <sub>165-637</sub> in XL1-Blue                                                             | This study       |
| DH-E1986                     | pAC- $\lambda$ CI- <i>gmaR</i> <sub>165-637</sub> in XL1-Blue                                                         | This study       |
| DH-E1987                     | pBR $\alpha$ - <i>gmaR</i> <sub>351-637</sub> in XL1-Blue                                                             | This study       |
| DH-E1988                     | pBR $\alpha$ - <i>gmaR</i> <sub>1-350</sub> in XL1-Blue                                                               | This study       |
| DH-E1989                     | pET29b- <i>gmaR</i> in XL1-Blue                                                                                       | This study       |
| DH-E1991                     | pET29b- <i>gmaR</i> in BL21star(DE3)                                                                                  | This study       |
| FW102<br>O <sub>1</sub> 2-62 | FW102 harboring an F'Kan bearing test promoter<br><i>plac</i> O <sub>1</sub> 2-62 linked to <i>lacZ</i>               | [8]              |
