# Supplementary material for: A Protein Thermometer Controls Temperature-Dependent Transcription of Flagellar Motility Genes in Listeria monocytogenes
Source: PubMed Central journal article supplement (PMC3150276; doi:10.1371/journal.ppat.1002153), 2011-08-04
Supplement: ppat.1002153.s008.pdf [file ppat.1002153.s008.pdf]

**Table S2. Oligonucleotides used in this study**

| Number | Sequence                                    | Site <sup>a</sup> |
|--------|---------------------------------------------|-------------------|
| 786    | GGAATTCC <u>CATATG</u> CGGCCGTTAATTTGATTTG  | <i>NdeI</i>       |
| 787    | CCACTCGAGTCGATTGTTTGTAACAGTGTC              | <i>XhoI</i>       |
| 788    | GAAGGCGGCCGCAATGCCTAAATCAGAAATAAG           | <i>NotI</i>       |
| 789    | GAAGGGATCCTTACATTTGTTTATAATTTTC             | <i>BamHI</i>      |
| 790    | GAAGGGATCCTTATTCAGCTGGCACAACTTTGCC          | <i>BamHI</i>      |
| 791    | GAAGGGATCCTTATCTCCAGGCTTGTTTTTCG            | <i>BamHI</i>      |
| 792    | GAAGGCGGCCGCAATGCGGCCGTTAATTTGATTTG         | <i>NotI</i>       |
| 793    | GAAGGGATCCCTATCGATTGTTTGTAACAG              | <i>BamHI</i>      |
| 794    | GAAGGCGGCCGCAATGAAAATTTACCATTATGGCTATATGTCG | <i>NotI</i>       |
| 795    | GAAGGGATCCCTAATCGGAACTGTTTTCCGCAT           | <i>BamHI</i>      |
| 796    | GAAGGCGGCCGCAATGTACGGTGTGATGTTCCA           | <i>NotI</i>       |

a. The indicated restriction endonuclease site is underlined within the oligonucleotide sequence
