# Supplementary material for: A Protein Thermometer Controls Temperature-Dependent Transcription of Flagellar Motility Genes in Listeria monocytogenes
Source: PubMed Central journal article supplement (PMC3150276; doi:10.1371/journal.ppat.1002153), 2011-08-04
Supplement: ppat.1002153.s009.pdf [file ppat.1002153.s009.pdf]

## Supporting Materials and Methods

### Strain Construction

To clone C-terminally His<sub>6</sub>-tagged GmaR, primer pair #786 and #787 were used with EGDe genomic DNA to amplify the *gmaR* coding sequence. The resulting PCR product was digested with *NdeI* and *XhoI* and ligated to pET29b digested with the same enzymes. The ligations were transformed into XL1-Blue, generating strain DH-E1989. The resulting plasmid pET29b-*gmaR* was transformed into BL21star(DE3), yielding strain DH-E1991.

To clone the MogR two-hybrid fusion proteins, the 5' primer #788 and the 3' primers #789, #790 or #791 were used with EGDe genomic DNA to amplify full-length MogR, MogR<sub>1-162</sub>, and MogR<sub>1-140</sub> respectively. To clone the GmaR two-hybrid fusion proteins, the 5' primer #792 and the 3' primers #793 or #795 were used with EGDe genomic DNA to amplify full-length GmaR or GmaR<sub>1-350</sub>, respectively. Primer pair #794 and #793 was used for GmaR<sub>165-637</sub> and primer pair #796 and #793 was used for GmaR<sub>351-637</sub>. The resulting PCR products were digested with *NotI* and *BamHI* and ligated into both pAC- $\lambda$ CI and pBR $\alpha$  and transformed into XL1-Blue.

### Fermentor Run

One liter of EPCM1 (Current Protocols in Protein Science, 1995, 5.3.1-5.3.18) containing 30  $\mu$ g/mL of kanamycin was inoculated with multiple colonies of strain DH-E1991 (starter culture) and incubated shaking 16-18 h at 37°C (final OD<sub>600</sub> = 5.7). The next day, the entire volume (1 L) of starter culture was added to 4 L of pre-warmed EPCM1 containing 30  $\mu$ g/mL of kanamycin in a 7 L fermentor (Applikon Biotechnology, Foster City CA). The starting OD<sub>600</sub> was ~1.0. The culture was grown at 37°C, pH 7.0, with mixing and addition of air and oxygen to maintain an excess of oxygen until an OD<sub>600</sub> of 5.0 was reached (~4 h). Protein expression was induced by lowering the temperature to 30°C before adding IPTG (0.8 mM). After 1.5 h of induction (OD<sub>600</sub>=7.2), the culture was harvested by centrifugation (20 min at 6,620 x g, 4°C). Culture supernatant was discarded and cell pellets frozen at -80°C until purification. One fermentation run yielded 60 g of frozen wet-cell pellet.

### Trypsin analysis

Purified GmaR-His<sub>6</sub> or MogR-His<sub>6</sub> was pre-incubated at either RT or 37°C in digestion buffer (10 mM Tris pH 7.5) for 5 min. Trypsin was then added to the purified protein at a concentration of 1:10,000. A 10  $\mu$ L volume containing 10  $\mu$ g of purified protein was removed at 0, 2, 5, 10, 15, 20, 30 and 60 min and immediately mixed with 2X loading buffer to stop digestion. The entire sample (20  $\mu$ L) for each time point was run on a 10% SDS-PAGE gel and stained with Coomassie for analysis.

## Supporting Information References

1. Shen A, Higgins DE, Panne D (2009) Recognition of AT-rich DNA binding sites by the MogR repressor. *Structure* 17: 769-777.
2. Kelley LA, Sternberg MJ (2009) Protein structure prediction on the Web: a case study using the Phyre server. *Nat Protoc* 4: 363-371.
3. Gründling A, Burrack LS, Bouwer HG, Higgins DE (2004) *Listeria monocytogenes* regulates flagellar motility gene expression through MogR, a transcriptional repressor required for virulence. *Proc Natl Acad Sci U S A* 101: 12318-12323.
4. Shen A, Higgins DE (2006) The MogR transcriptional repressor regulates nonhierarchical expression of flagellar motility genes and virulence in *Listeria monocytogenes*. *PLoS Pathog* 2: e30.
5. Dove SL, Joung JK, Hochschild A (1997) Activation of prokaryotic transcription through arbitrary protein-protein contacts. *Nature* 386: 627-630.
6. Kuznedelov K, Korzheva N, Mustaev A, Severinov K (2002) Structure-based analysis of RNA polymerase function: the largest subunit's rudder contributes critically to elongation complex stability and is not involved in the maintenance of RNA-DNA hybrid length. *Embo J* 21: 1369-1378.
7. Deighan P, Diez CM, Leibman M, Hochschild A, Nickels BE (2008) The bacteriophage lambda Q antiterminator protein contacts the beta-flap domain of RNA polymerase. *Proc Natl Acad Sci U S A* 105: 15305-15310.
8. Deaconescu AM, Chambers AL, Smith AJ, Nickels BE, Hochschild A, et al. (2006) Structural basis for bacterial transcription-coupled DNA repair. *Cell* 124: 507-520.
